# Supplementary material for: Age-Associated Decline in Thymic B Cell Expression of Aire and Aire-Dependent Self-Antigens
Source: PubMed Central journal article supplement — Cell Rep. Author manuscript; Available in PMC 2018 Feb 15. (PMC5813500; doi:10.1016/j.celrep.2018.01.015), 2018-01-30
Supplement: NIHMS941211-supplement-1.pdf [file NIHMS941211-supplement-1.pdf]

**Cell Reports, Volume 22**

**Supplemental Information**

**Age-Associated Decline in Thymic**

**B Cell Expression of Aire**

**and Aire-Dependent Self-Antigens**

**Sergio Cepeda, Carolina Cantu, Stephanie Orozco, Yangming Xiao, Zoe Brown, Manpreet K. Semwal, Thomas Venables, Mark S. Anderson, and Ann V. Griffith**

Figure S1. B cell number and localization in the aged mouse thymus. Related to Figure 1.

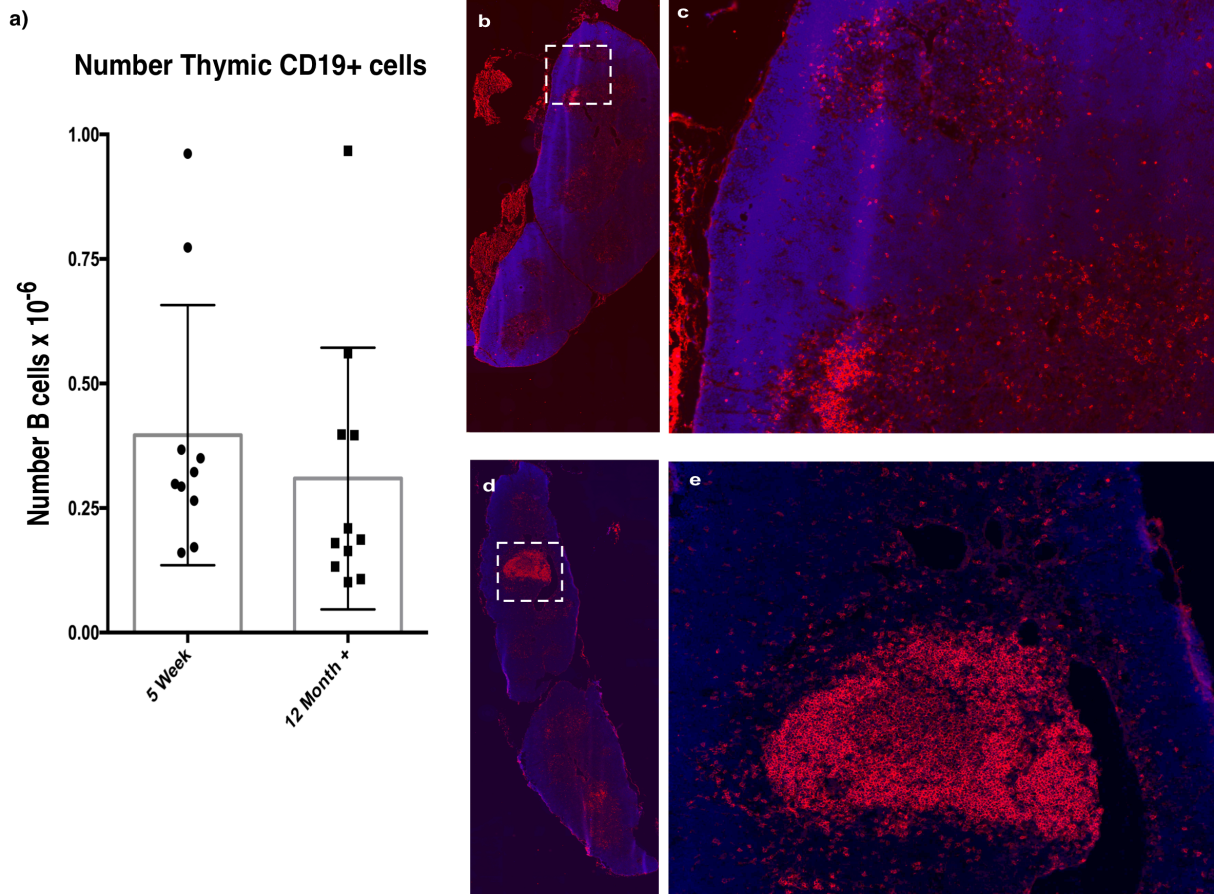

**Supplemental Figure 1. B cell number and localization in the aged mouse thymus.** a) The number of CD19+ B cells in thymus in young (5 week, n= 10) and aged (12-24 month, n=11) mouse thymus. Bars indicate mean  $\pm$  SEM. b) Anti-B220 (red), and DAPI (blue) stains identify B cells and nuclei, respectively. B cells increase in frequency in 12 month-old mice (b-e). Stitched composite 40X images were assembled (b,d) to identify the spatial/anatomical organization of thymic B cells in 12 month-old mice. Thymic B cells are most common in medulla, but are also present in cortex less frequently. Panels c and e are higher magnification images from the inset boxes in b and d, respectively. Panels b-e represent 2 individual 12 month-old mice.

Figure S2. Validation of RNAseq by qPCR. Related to Figure 2.

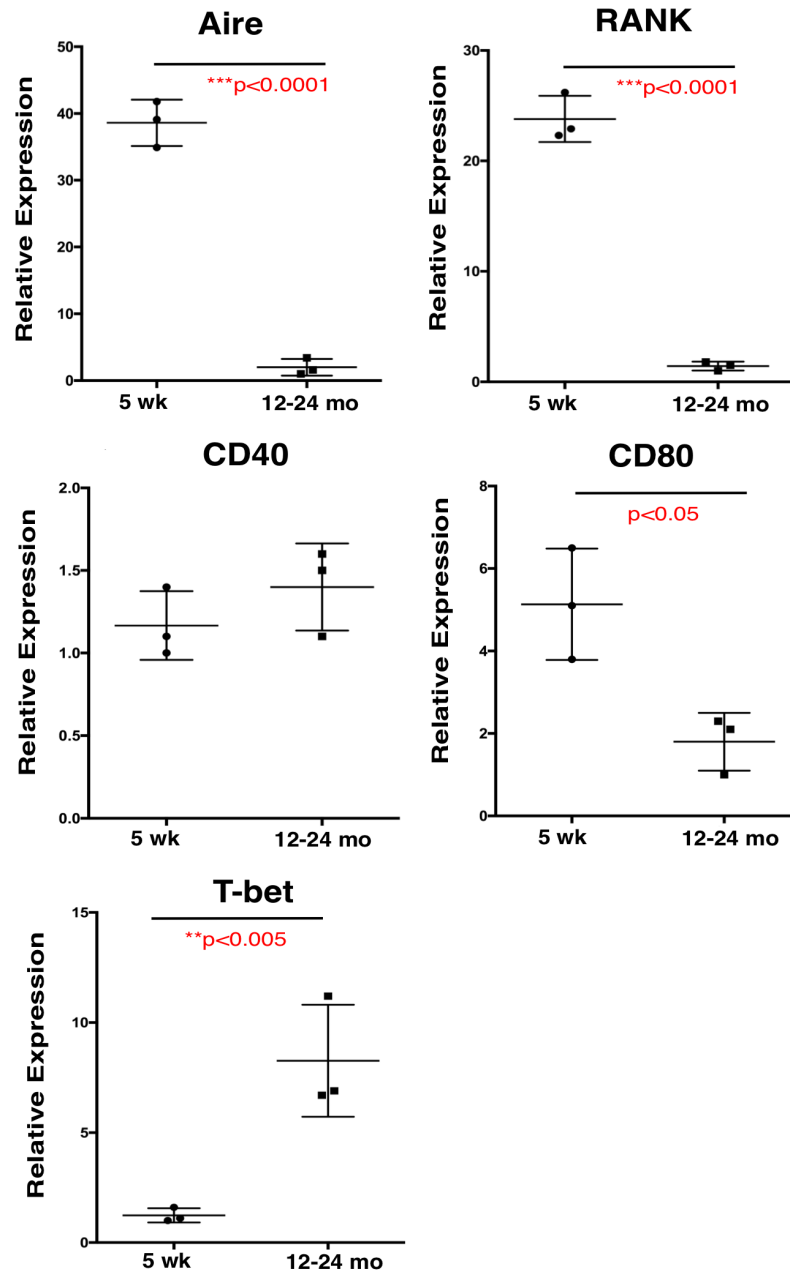

**Supplemental Figure 2. Validation of RNA-seq by qPCR.** Relative expression levels of Aire, RANK, CD40, CD80, and T-bet were measured by qPCR to confirm RNA-seq results in intrathymic B cells described in Figure 2, normalized to Hprt. Bars indicate mean  $\pm$  SEM. P-values calculated using student's t-test.

Figure S3. Diminished frequency of Aire expressing thymic B cells in aged mice. Related to Figure 4.

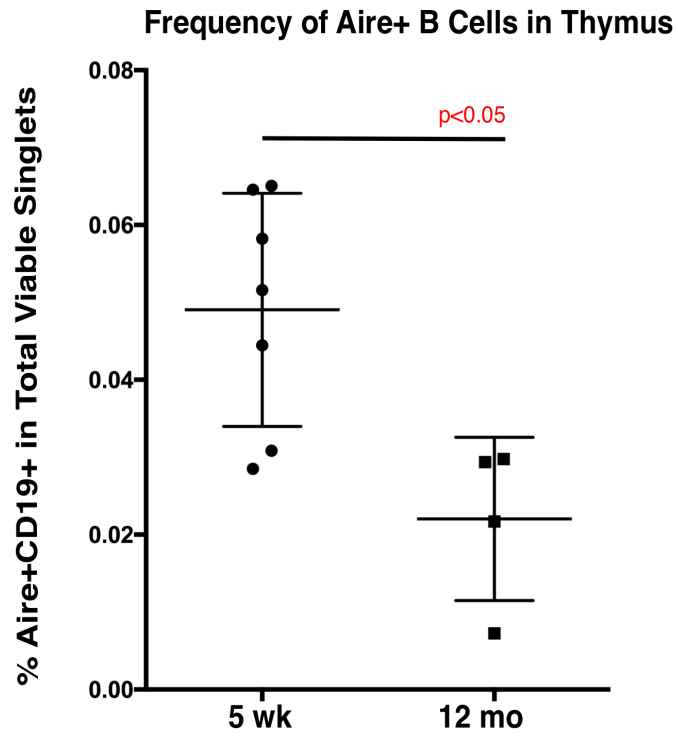

**Supplemental Figure 3. Diminished frequency of Aire expressing thymic B cells in aged mice.** a) Frequency of Aire-GFP+ B cells in total viable, singlet thymus cells in 5 week old (n=7) and 12 month old (n=4) Adig reporter mice. Bars indicate means and standard deviation. P-values calculated using unpaired two-tailed Student's t-test.

Table S1. Expression of Aire-dependent B cell-specific genes in human and murine thymic B cells. Related to Figure 3.

| Human Aire-Dependent B cell-specific Gene List |            |          |                 | Mouse Aire-Dependent B cell-specific Gene List |            |          |                 |
|------------------------------------------------|------------|----------|-----------------|------------------------------------------------|------------|----------|-----------------|
| Gene Symbol                                    | Young Mean | Old Mean | p value (limma) | Gene Symbol                                    | Young Mean | Old Mean | p value (limma) |
| HLA-B                                          | 1547.958   | 1705.964 | 6.657E-01       | A630023P12Rik                                  | 8411.812   | 2525.442 | 2.085E-04       |
| NLRC5                                          | 92.291     | 133.245  | 3.094E-02       | Stard9                                         | 4608.144   | 6209.816 | 1.233E-01       |
| OAS2                                           | 84.705     | 39.954   | 4.082E-03       | G630030J09Rik                                  | 1037.906   | 1096.159 | 6.671E-01       |
| PHF11                                          | 44.179     | 45.412   | 9.731E-01       | Vwa3b                                          | 931.758    | 1590.937 | 1.509E-01       |
| PARP12                                         | 41.641     | 36.048   | 2.881E-01       | Gm10382                                        | 865.037    | 1303.538 | 1.864E-01       |
| DDX60                                          | 39.690     | 18.345   | 2.046E-02       | 1600012P17Rik                                  | 502.689    | 12.151   | 4.276E-08       |
| GPR114                                         | 39.546     | 47.613   | 3.157E-01       | Flt3                                           | 286.122    | 96.890   | 7.524E-05       |
| ZBP1                                           | 34.151     | 24.359   | 2.013E-01       | H2-Q7                                          | 274.756    | 221.847  | 2.907E-02       |
| HSPH1                                          | 25.613     | 17.108   | 2.658E-01       | Gm16315                                        | 259.682    | 80.185   | 5.330E-03       |
| RSAD2                                          | 24.805     | 13.674   | 3.712E-02       | Zbtb32                                         | 253.086    | 442.974  | 2.541E-01       |
| CSF2RB                                         | 23.833     | 21.660   | 6.924E-01       | Tet2                                           | 236.196    | 185.398  | 3.249E-03       |
| FNIP1                                          | 12.691     | 12.230   | 7.847E-01       | Gm17034                                        | 167.378    | 76.755   | 5.532E-01       |
| TET2                                           | 12.607     | 9.146    | 1.400E-01       | Gatsl3                                         | 94.560     | 31.791   | 2.483E-05       |
| SLC5A3                                         | 10.755     | 4.457    | 1.938E-02       | Nlrc5                                          | 92.896     | 73.244   | 5.542E-02       |
| ZBTB32                                         | 9.410      | 46.717   | 1.306E-04       | Ctsw                                           | 79.631     | 17.457   | 3.639E-04       |
| PIK3R6                                         | 9.156      | 10.183   | 7.641E-01       | Aire                                           | 73.472     | 8.124    | 9.067E-08       |
| AHR                                            | 8.456      | 9.344    | 4.584E-01       | St8sia1                                        | 73.425     | 8.652    | 1.504E-06       |
| OBSCN                                          | 7.506      | 5.992    | 3.553E-01       | Atp10a                                         | 62.356     | 17.126   | 3.169E-04       |
| SSPN                                           | 7.412      | 20.217   | 7.154E-02       | Zbp1                                           | 57.560     | 44.828   | 1.079E-01       |
| ATP2B4                                         | 6.954      | 16.945   | 2.840E-03       | Hsph1                                          | 55.356     | 30.757   | 7.306E-02       |
| STK38L                                         | 6.656      | 7.312    | 5.894E-01       | Oas2                                           | 41.858     | 12.046   | 3.048E-04       |
| ARHGAP19                                       | 5.970      | 5.673    | 6.940E-01       | Cdh17                                          | 36.628     | 12.501   | 2.977E-06       |
| HK2                                            | 4.805      | 1.327    | 3.670E-02       | Mx1                                            | 35.501     | 11.388   | 8.179E-04       |
| GATSL3                                         | 4.430      | 6.092    | 2.075E-01       | Stxbp1                                         | 33.622     | 20.905   | 8.832E-04       |
| SOCS3                                          | 3.922      | 1.378    | 5.109E-02       | Rprm                                           | 27.757     | 4.905    | 3.037E-05       |

|         |       |       |           |               |        |        |           |
|---------|-------|-------|-----------|---------------|--------|--------|-----------|
| IL2RB   | 3.820 | 2.592 | 2.973E-01 | Stk38l        | 25.856 | 21.481 | 9.798E-02 |
| PKD2    | 3.506 | 1.287 | 2.748E-02 | Slfn1         | 24.499 | 4.909  | 1.526E-04 |
| RAG1    | 2.972 | 2.267 | 2.691E-01 | Rag1          | 23.969 | 12.384 | 3.724E-02 |
| CISH    | 2.758 | 1.294 | 2.469E-01 | Ahr           | 22.857 | 8.561  | 7.985E-07 |
| CTSW    | 2.733 | 2.018 | 4.006E-01 | Oasl2         | 21.813 | 8.976  | 2.753E-04 |
| CD3E    | 2.716 | 2.404 | 3.219E-01 | Sspn          | 20.386 | 10.493 | 7.209E-04 |
| FLT3    | 2.400 | 2.324 | 5.743E-01 | Ddx60         | 17.870 | 5.147  | 5.849E-05 |
| RUNX2   | 2.362 | 0.400 | 5.110E-02 | Gbp7          | 17.849 | 14.800 | 1.077E-01 |
| SOCS2   | 2.160 | 1.124 | 2.853E-01 | Atp2b4        | 16.824 | 10.951 | 5.661E-02 |
| SLC24A1 | 1.692 | 2.055 | 6.247E-01 | Socs3         | 15.860 | 17.888 | 3.789E-01 |
| LAMP3   | 1.601 | 0.156 | 4.937E-02 | Fnip1         | 15.310 | 13.320 | 4.548E-02 |
| SYN3    | 1.187 | 2.094 | 5.674E-01 | 2810429I04Rik | 14.990 | 5.834  | 4.396E-06 |
| CD8A    | 1.042 | 0.983 | 6.701E-01 | Nek2          | 14.877 | 6.455  | 1.369E-04 |
| GBP7    | 0.707 | 2.467 | 5.331E-04 | Il2rb         | 13.549 | 6.172  | 1.071E-03 |
| EML5    | 0.672 | 0.011 | 1.362E-01 | 1700071M16Rik | 13.160 | 12.151 | 7.058E-01 |
| ATP10A  | 0.625 | 0.942 | 4.017E-01 | Gm16184       | 13.160 | 12.151 | 7.058E-01 |
| TP73    | 0.548 | 0.015 | 4.297E-01 | 4930594C11Rik | 12.733 | 13.579 | 4.476E-01 |
| AIRE    | 0.531 | 0.461 | 1.273E-02 | Pik3r6        | 10.925 | 3.145  | 1.792E-05 |
| NEK2    | 0.405 | 3.822 | 1.173E-02 | Cish          | 9.207  | 2.713  | 4.064E-05 |
| DBNDD1  | 0.394 | 0.025 | 7.246E-01 | Cd3e          | 8.786  | 6.913  | 3.070E-01 |
| RAPGEF4 | 0.332 | 0.026 | 1.484E-02 | Hk2           | 8.729  | 4.803  | 1.237E-04 |
| SEMA6A  | 0.251 | 0.104 | 1.559E-01 | Pvr           | 8.320  | 5.574  | 5.110E-03 |
| GAS2L3  | 0.111 | 0.003 | 6.891E-01 | Rsad2         | 6.509  | 1.870  | 1.650E-04 |
| CDH17   | 0.105 | 0.327 | 4.883E-01 | Lamp3         | 6.253  | 2.010  | 1.199E-06 |
| ST8SIA1 | 0.103 | 0.383 | 8.306E-01 | Cd8a          | 5.995  | 5.790  | 5.649E-01 |
| GGN     | 0.086 | 0.824 | 9.307E-01 | Grik2         | 5.320  | 0.093  | 4.577E-04 |
| VASN    | 0.061 | 0.572 | 3.088E-01 | Parp12        | 5.287  | 1.711  | 7.778E-04 |
| ACSBG1  | 0.060 | 0.085 | 4.090E-05 | Arhgap19      | 4.316  | 3.266  | 2.825E-01 |

|         |       |       |           |         |       |       |           |
|---------|-------|-------|-----------|---------|-------|-------|-----------|
| VWA3B   | 0.047 | 0.002 | 1.180E-04 | Sema6d  | 4.071 | 1.677 | 2.163E-04 |
| FAM196B | 0.041 | 0.009 | 6.439E-05 | Eml5    | 3.876 | 4.525 | 1.098E-01 |
| MAP3K15 | 0.029 | 0.002 | 1.445E-01 | Acsbg1  | 3.011 | 0.385 | 1.782E-06 |
| STXBP1  | 0.028 | 0.014 | 1.597E-01 | Slc5a3  | 2.943 | 2.427 | 1.374E-01 |
| SEMA6D  | 0.026 | 0.002 | 3.919E-01 | Rapgef4 | 2.786 | 7.120 | 3.371E-05 |
| TFCP2L1 | 0.020 | 0.006 | 1.540E-01 | Socs2   | 2.347 | 0.507 | 3.443E-04 |
| GRIK2   | 0.012 | 0.002 | 7.619E-01 | Siglech | 2.227 | 0.427 | 2.845E-06 |
| RANBP17 | 0.006 | 0.001 | 4.176E-01 | ligp1   | 2.134 | 5.590 | 1.252E-02 |
| RPRM    | 0.005 | 0.002 | 5.126E-01 | Map3k15 | 2.107 | 3.751 | 3.400E-02 |
| SCEL    | 0.002 | 0.009 | 5.108E-01 | Gas2l3  | 1.958 | 1.002 | 8.010E-02 |
| LIF     | 0.002 | 0.002 | 7.272E-01 | Runx2   | 1.362 | 1.625 | 3.018E-01 |
|         |       |       |           | Scel    | 1.213 | 0.176 | 1.012E-04 |
|         |       |       |           | Csf2rb2 | 1.111 | 1.063 | 5.990E-01 |
|         |       |       |           | Ggn     | 1.080 | 0.458 | 3.262E-04 |
|         |       |       |           | Trp73   | 0.902 | 0.642 | 8.222E-02 |
|         |       |       |           | Pkd2    | 0.598 | 0.110 | 3.586E-06 |
|         |       |       |           | Syn3    | 0.396 | 0.841 | 7.067E-02 |
|         |       |       |           | Vasn    | 0.335 | 0.172 | 1.020E-02 |
|         |       |       |           | Lif     | 0.180 | 0.025 | 1.014E-03 |
|         |       |       |           | Obscn   | 0.173 | 0.188 | 6.482E-01 |
|         |       |       |           | Gm9855  | 0.165 | 0.160 | 9.945E-01 |
|         |       |       |           | Ranbp17 | 0.156 | 0.421 | 2.855E-02 |
|         |       |       |           | Fam196b | 0.058 | 0.050 | 8.996E-01 |
|         |       |       |           | Dbn1    | 0.035 | 0.011 | 2.268E-01 |
|         |       |       |           | Slc24a1 | 0.018 | 0.010 | 5.133E-01 |
|         |       |       |           | Sema6a  | 0.011 | 0.013 | 9.230E-01 |

**Supplemental Table 1.** List of Aire-dependent B cell-specific genes identified by Yamano et al. with average RNAseq expression values (RPKM) in young (3 month, 5months, 4 years, n=3) and aged (42-61 years, n=3) human thymic B cells and in young (5 week, n=7) and aged (12-24 month, n=5) murine thymic B cells. P-value calculated with *limma*.

## Supplemental Experimental Procedures

### *Immunofluorescent microscopy*

Thymi removed after euthanasia, embedded in ice-cold OCT (Fisher Scientific), and immediately frozen. 5 micron transverse sections were fixed in ice-cold acetone, stained with Alexa 594-conjugated anti-B220 antibody and then mounted in Prolong Gold (Molecular Probes) containing 0.25 $\mu$ g/ml DAPI. Images were captured on a fluorescent microscope using mercury illumination.
